# Supplementary material for: Measuring the oxygen content of a single oil droplet
Source: Royal Society of Chemistry journal article supplement (doi:10.1039/c6sc02357f), 2016-01-01
Supplement: c6sc02357f1.pdf [file c6sc02357f1.pdf]

## Supporting Information

### Linear sweep voltammograms in oxygenated toluene, oxygenated water, and oxygenated toluene/water emulsion

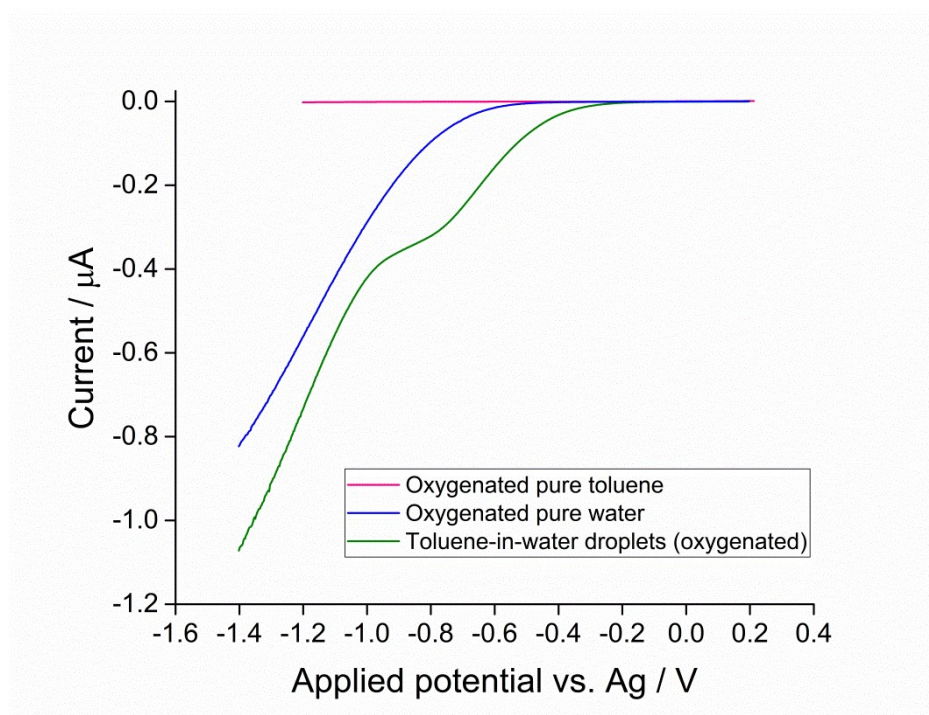

Figure S1 Linear sweep voltammograms in oxygenated pure toluene (red), oxygenated pure water (blue), and oxygenated toluene emulsion using a microwire electrode.

### Nanoimpacts of oxygenated toluene emulsion droplets

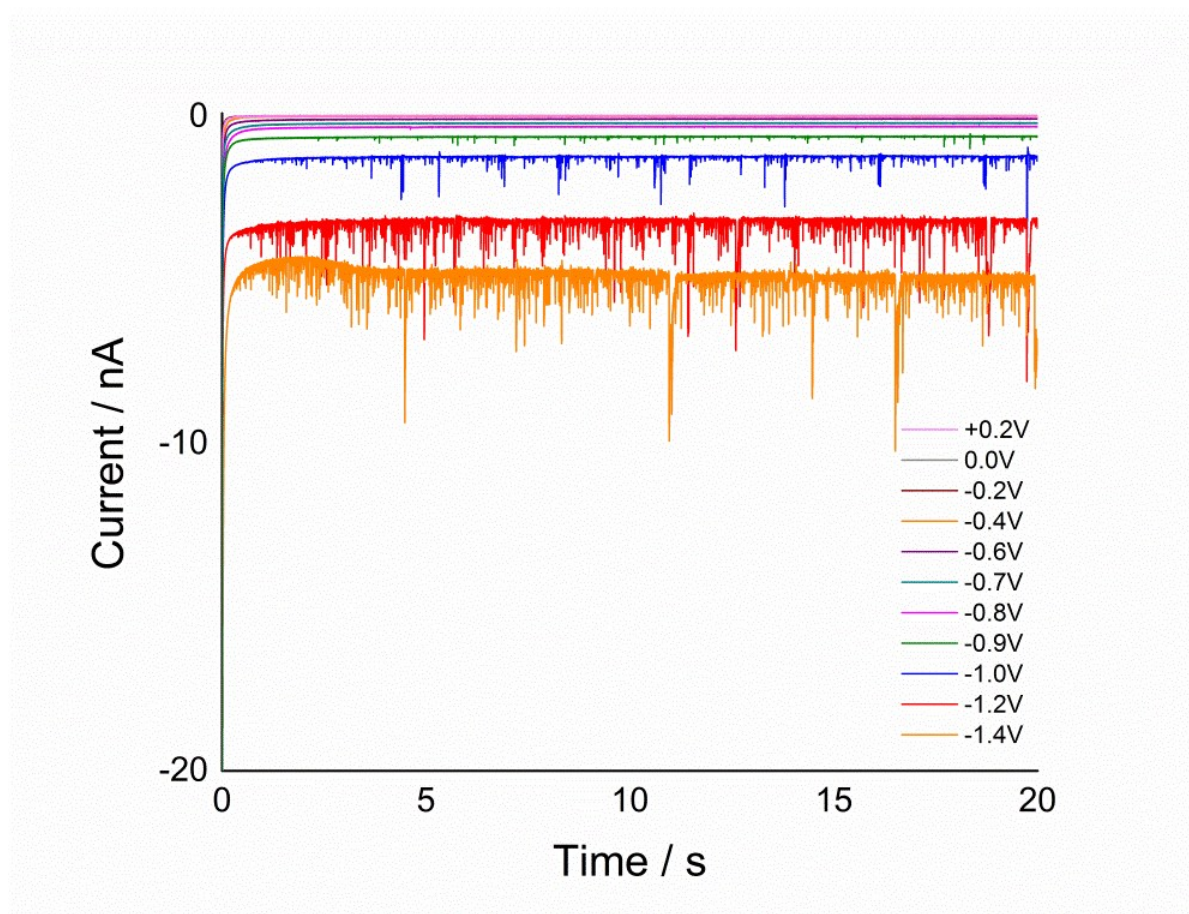

Figure S2 Chronoamperograms collected at a series of negative potentials covering the range of 0.2 V to -1.4 V vs. silver pseudo-reference electrode in the oxygenated toluene emulsion using a microdisk electrode.

**Tafel plot of the voltammogram of bulk emulsions and single droplet “voltammogram”**

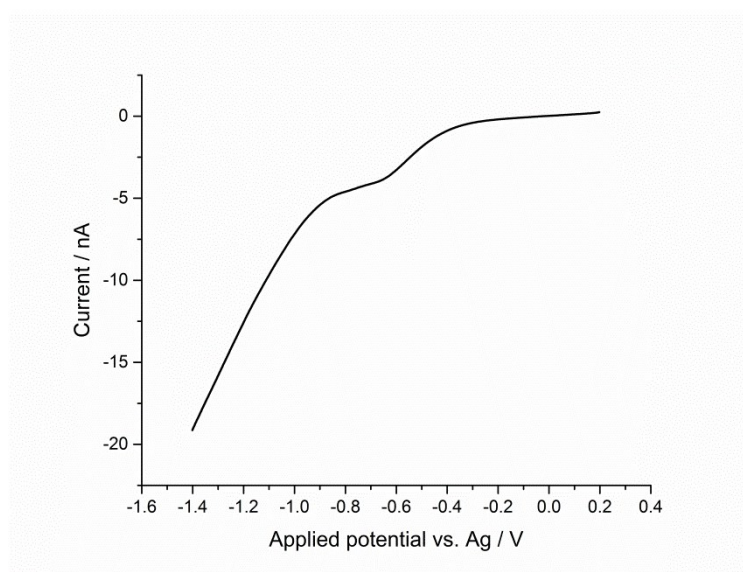

Figure S3 (a) A voltammogram showing the oxygen reduction behaviour in the bulk emulsion

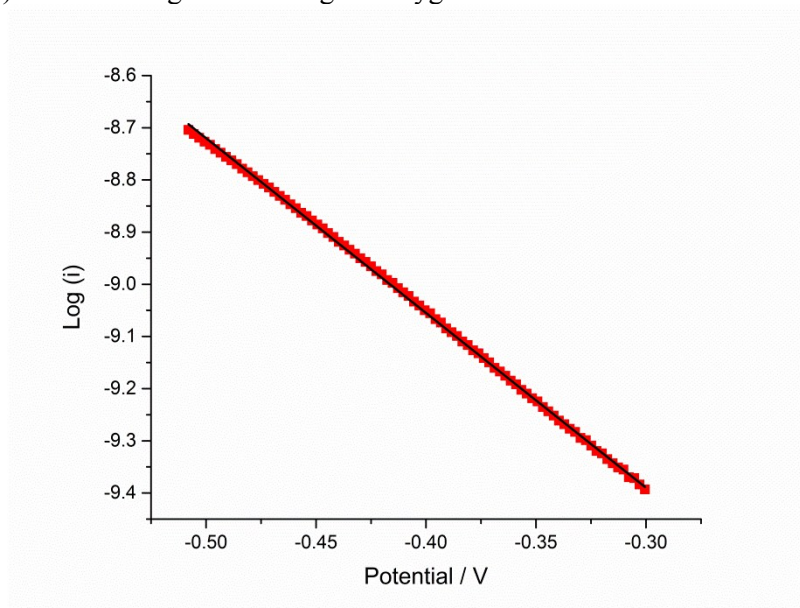

Figure S3 (b) a Tafel plot for oxygen reduction in the bulk emulsion

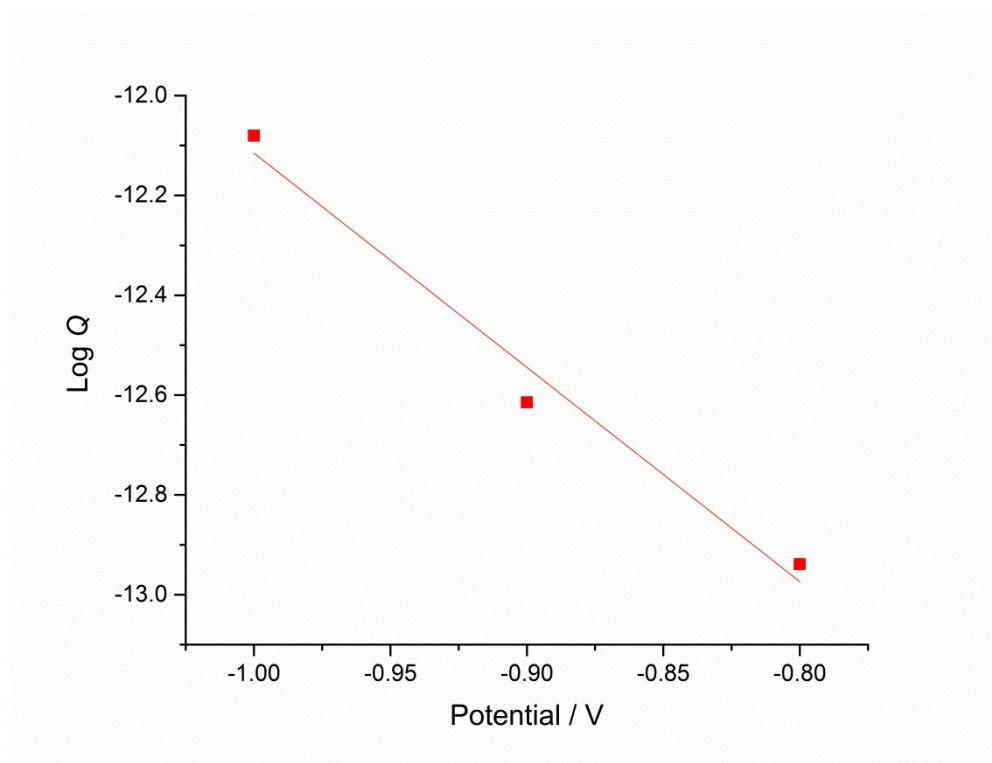

Figure S3 (c) Tafel plot for single droplet “voltammogram”.



**Nano- Impacts: the charge resulting from oxygen filled in each single emulsion droplets of a total number of 1130**

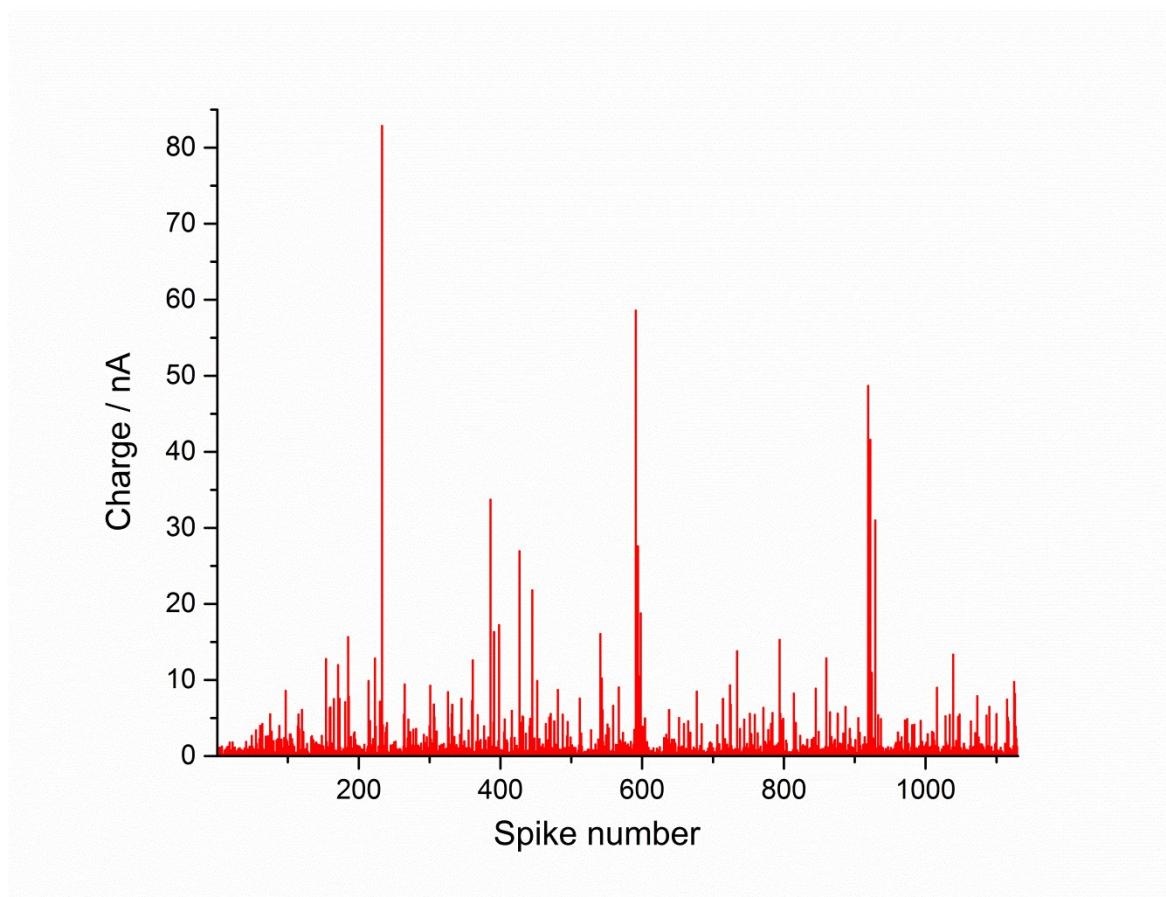

Figure S4 The charge resulting from the reduction of oxygen filled 1130 single droplets (spike number is in the order of appearance during the time course of experiment).

### Size distribution of synthesised Fc filled droplets

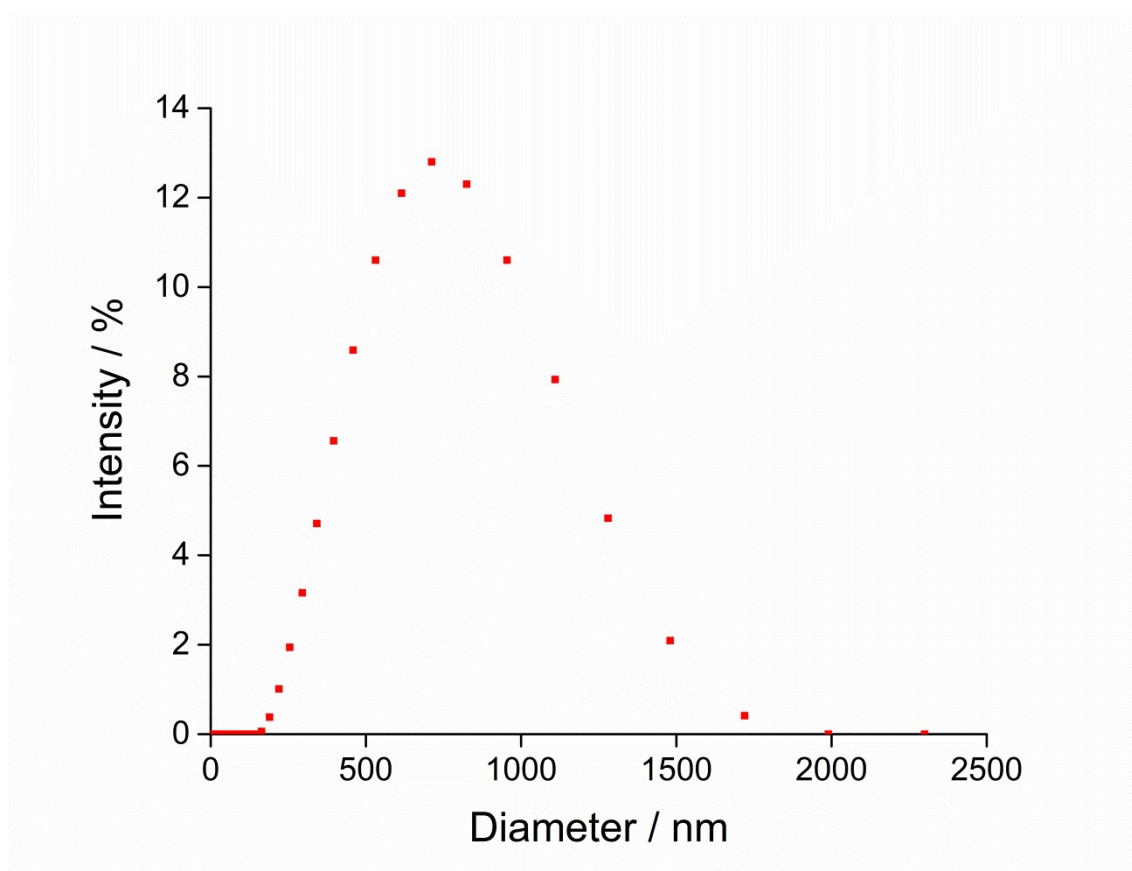

Figure S5 The size distribution of synthesised Fc filled droplets measured by DLS.
